# Supplementary material
Source: Research Square preprint supplement (doi:10.21203/rs.3.rs-9438383/v1)
Supplement: Supplementary file 1 [file 54ac1f99329f0333bea3be7f.docx]

**Supplementary for “Inclination asymmetry enables plasticity-mediated grain boundary migration in metals”**

Mohammed Kamran Bhat1, Anxin Ma1, Maik Punke2, Peter Schweizer1, Hui Ding1, Waleed Mohammed1, James P. Best1, Dierk Raabe1, Tobias Brink1, *Marco Salvalaglio2,3 & *Gerhard Dehm1

1 *Max Planck Institute for Sustainable Materials, 40237 Düsseldorf, Germany*

*2 Institute of Scientific Computing, TU Dresden, 01062 Dresden, Germany.*

*3 Dresden Center for Computational Materials Science, TU Dresden, 01062 Dresden, Germany.*

**Corresponding authors: :* [*marco.salvalaglio@tu-dresden.de*](mailto:marco.salvalaglio@tu-dresden.de)*,* [*dehm@mpi-susmat.de*](mailto:dehm@mpi-susmat.de)

**Section S1: Experimental results**


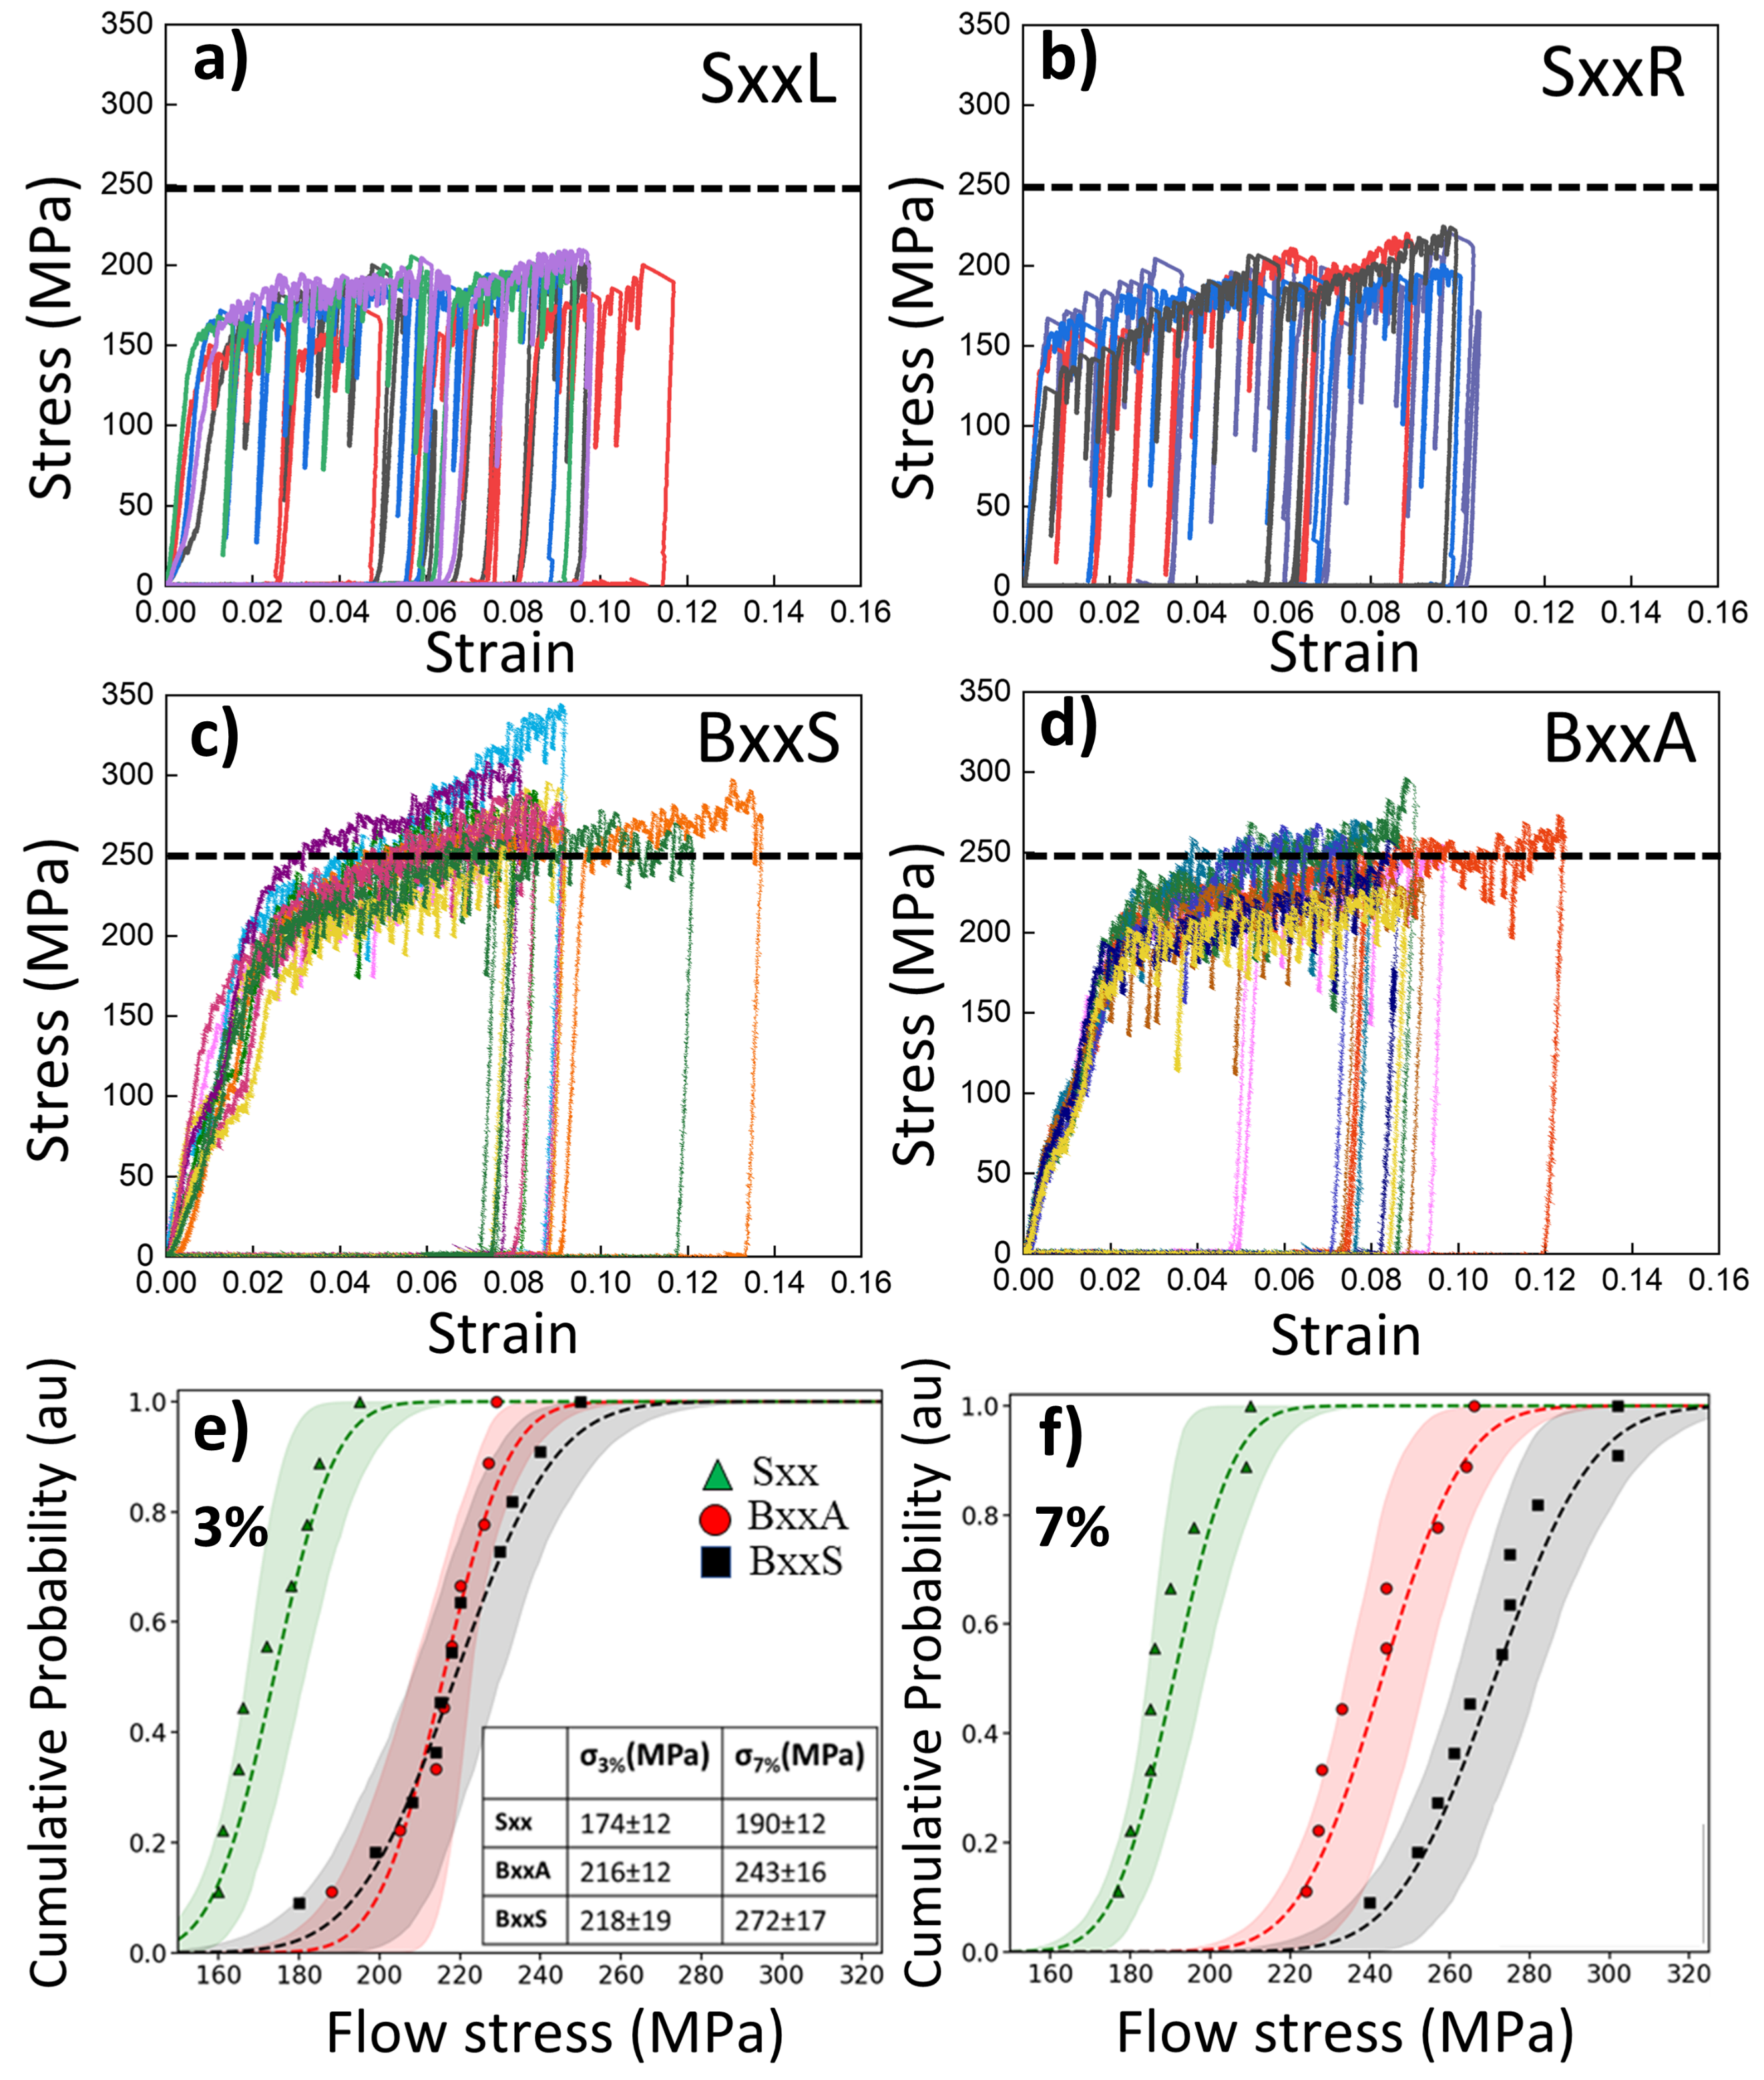


**Figure S1**: **(a–d)** Stress vs strain behaviour of several micropillars tested at strain rate of 10-3 s-1. **(a)** Single crystalline micropillar corresponding to SxxL. **(b)** Single crystalline micropillar corresponding to SxxR **(c)** BxxS containing micropillar, and (d) BxxA conating micropillars. **(e–f)** Cumulative probability distribution of the flow stress for single-crystalline (Sxx), counter-bodies and two GB inclinations at **(e)** 3% strain and **(f)** 7% strain, including the best-fit curve and the 95% confidence intervals. A arbitary dashed black line at 250 MPa in **(a–d)** serves only as a guide for the eyes.


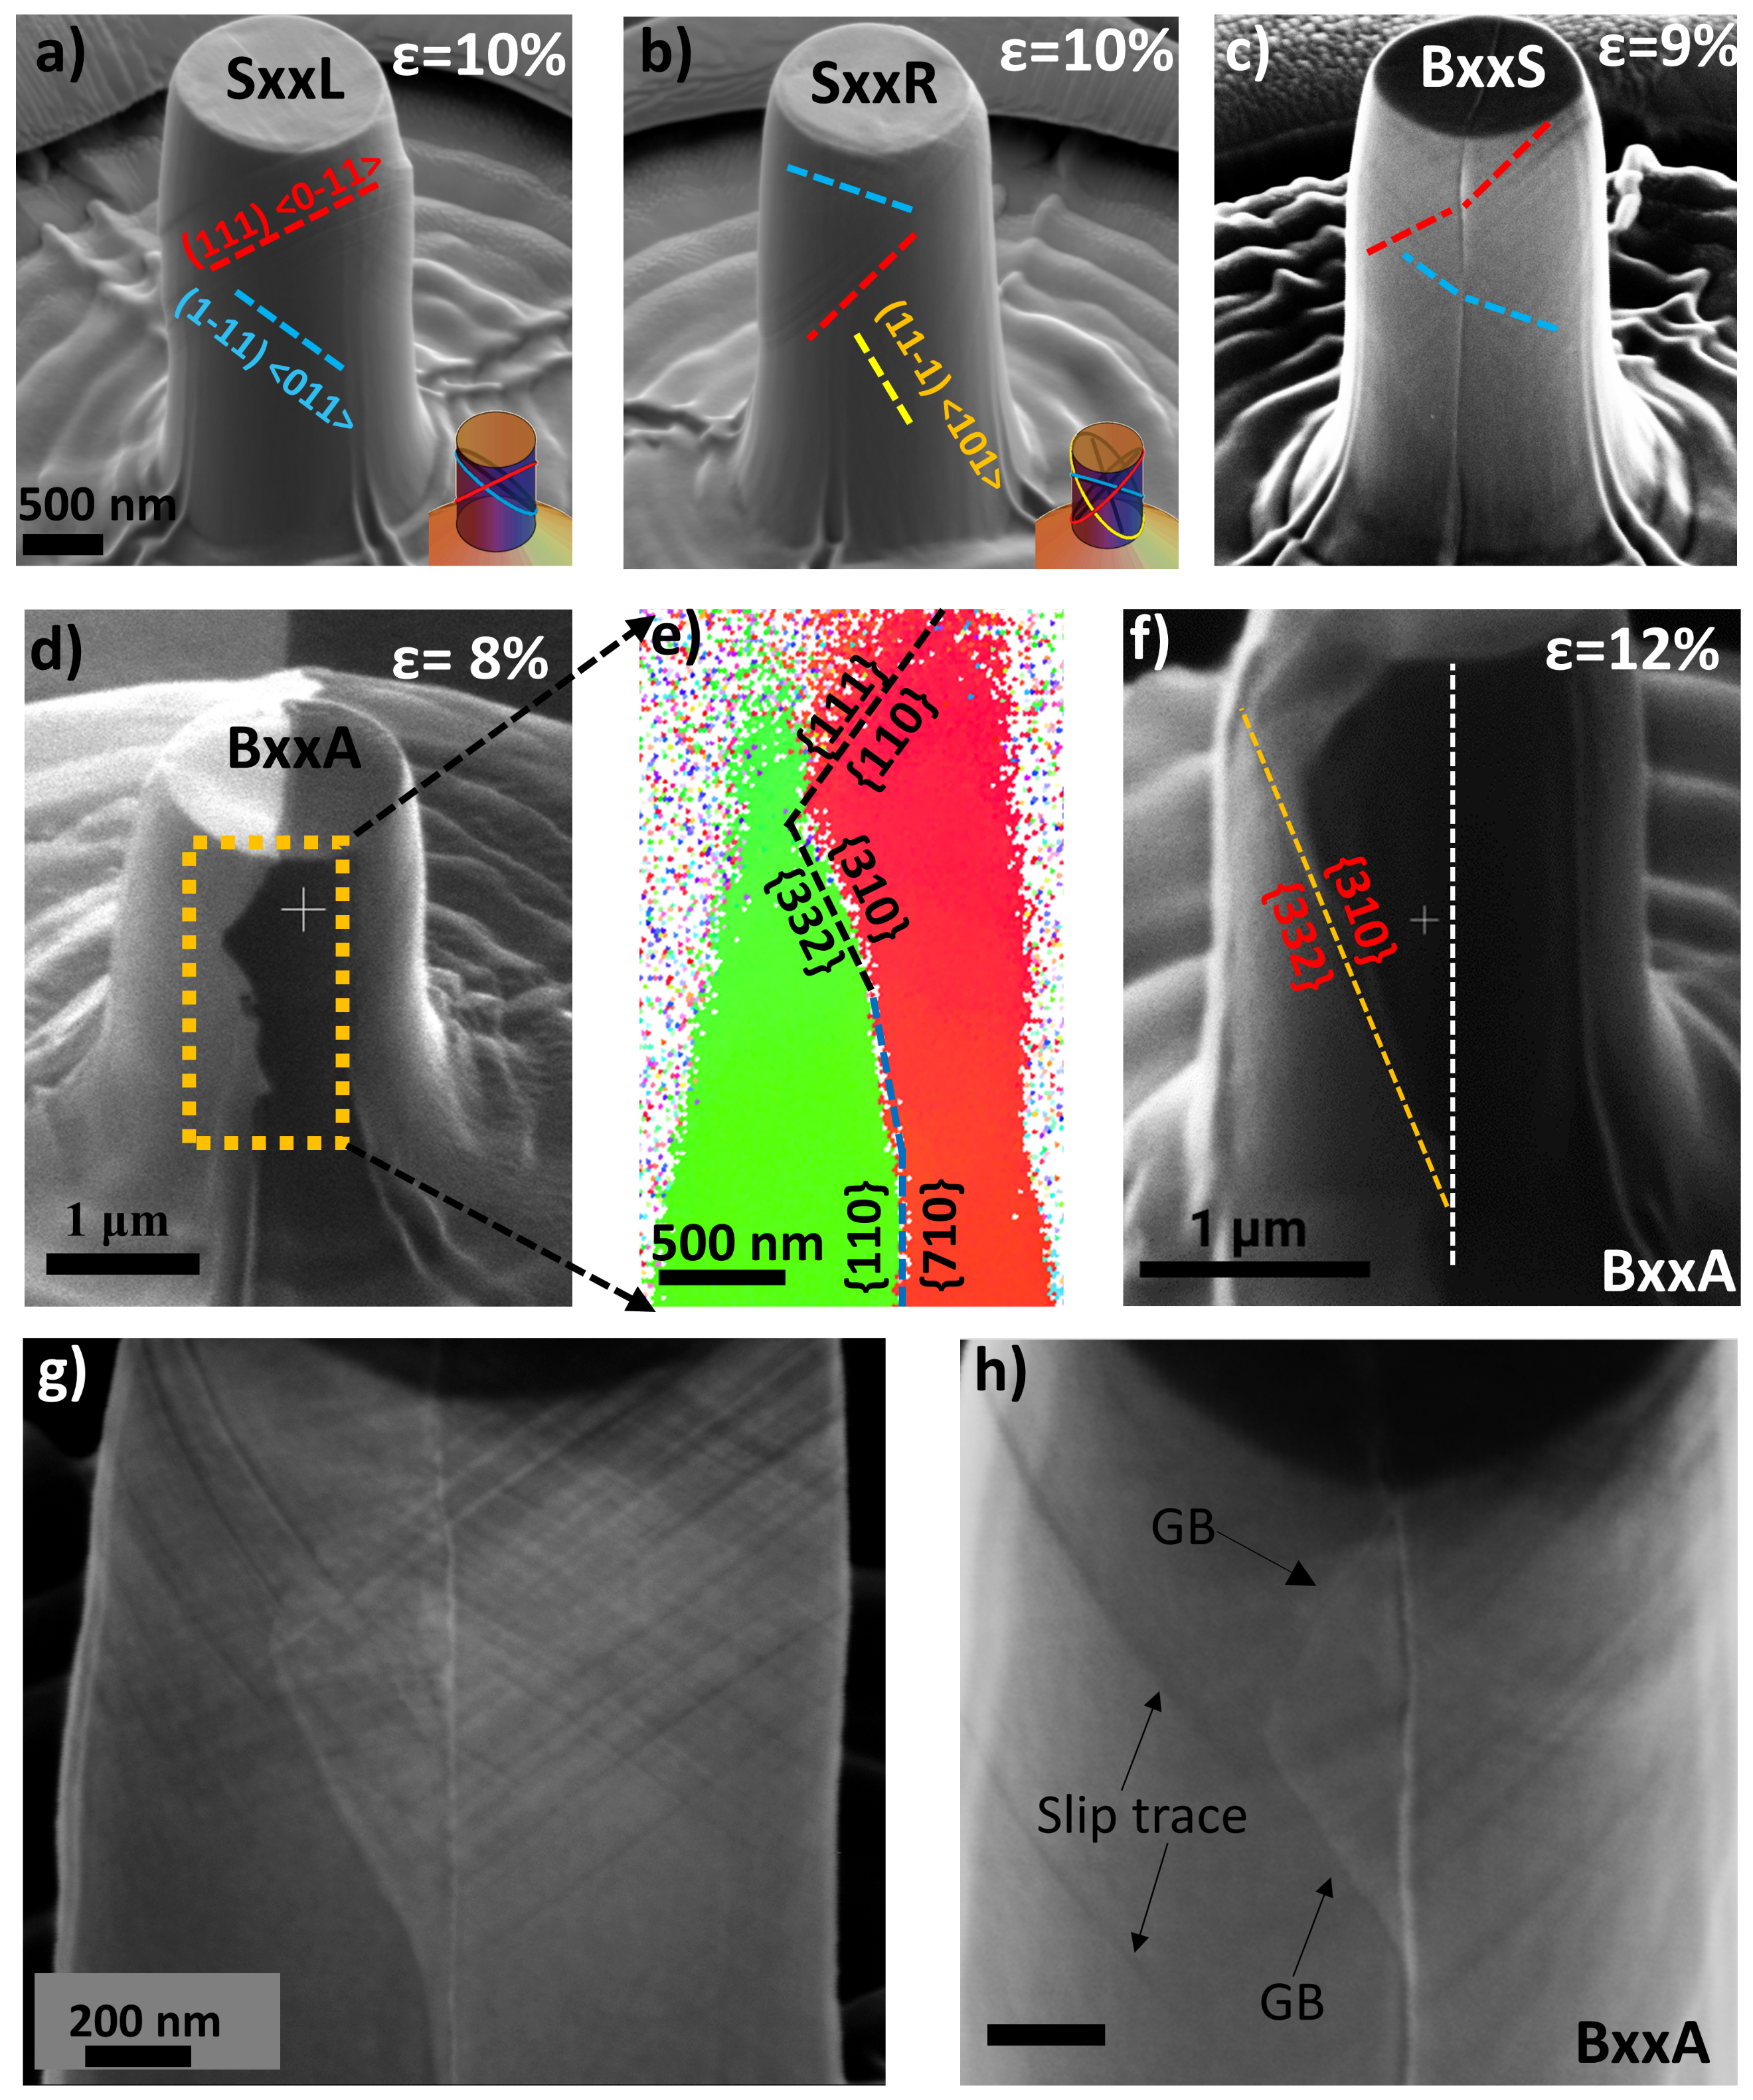


**Figure S2: (a-b)** Post-deformation images of GL and GR deformed to a strain of 10%. The slip traces are identified and the insets show simulated slip traces. **(c)** Post-deformation image of BxxS deformed to a strain of 9%. d) FIB images reveal sharp grain contrast in BxxA deformed to 8% strain. **(e)** Corresponding EBSD cross-section clearly show that the SxxR grain is growing relative to SxxL, with GB facets highlighted by dashed lines. Note that the top {111}/{110} facet could not be accurately determined in **(e)** due to poor indexing and is referenced from **(d)**. **(f)** FIB grain-contrast image of BxxA deformed to 12% strain, which is the maximum strain tested in our experiments. The migrated GB is highlighted in yellow and corresponds to the {310}/{332} GB plane. The white dashed line marks the original GB position. **(g)** Corresponding to Fig. 2c, shown without annotations or markings. **(h)** BxxA micropillar with both migrated facets aligned close to {111}/{110}.


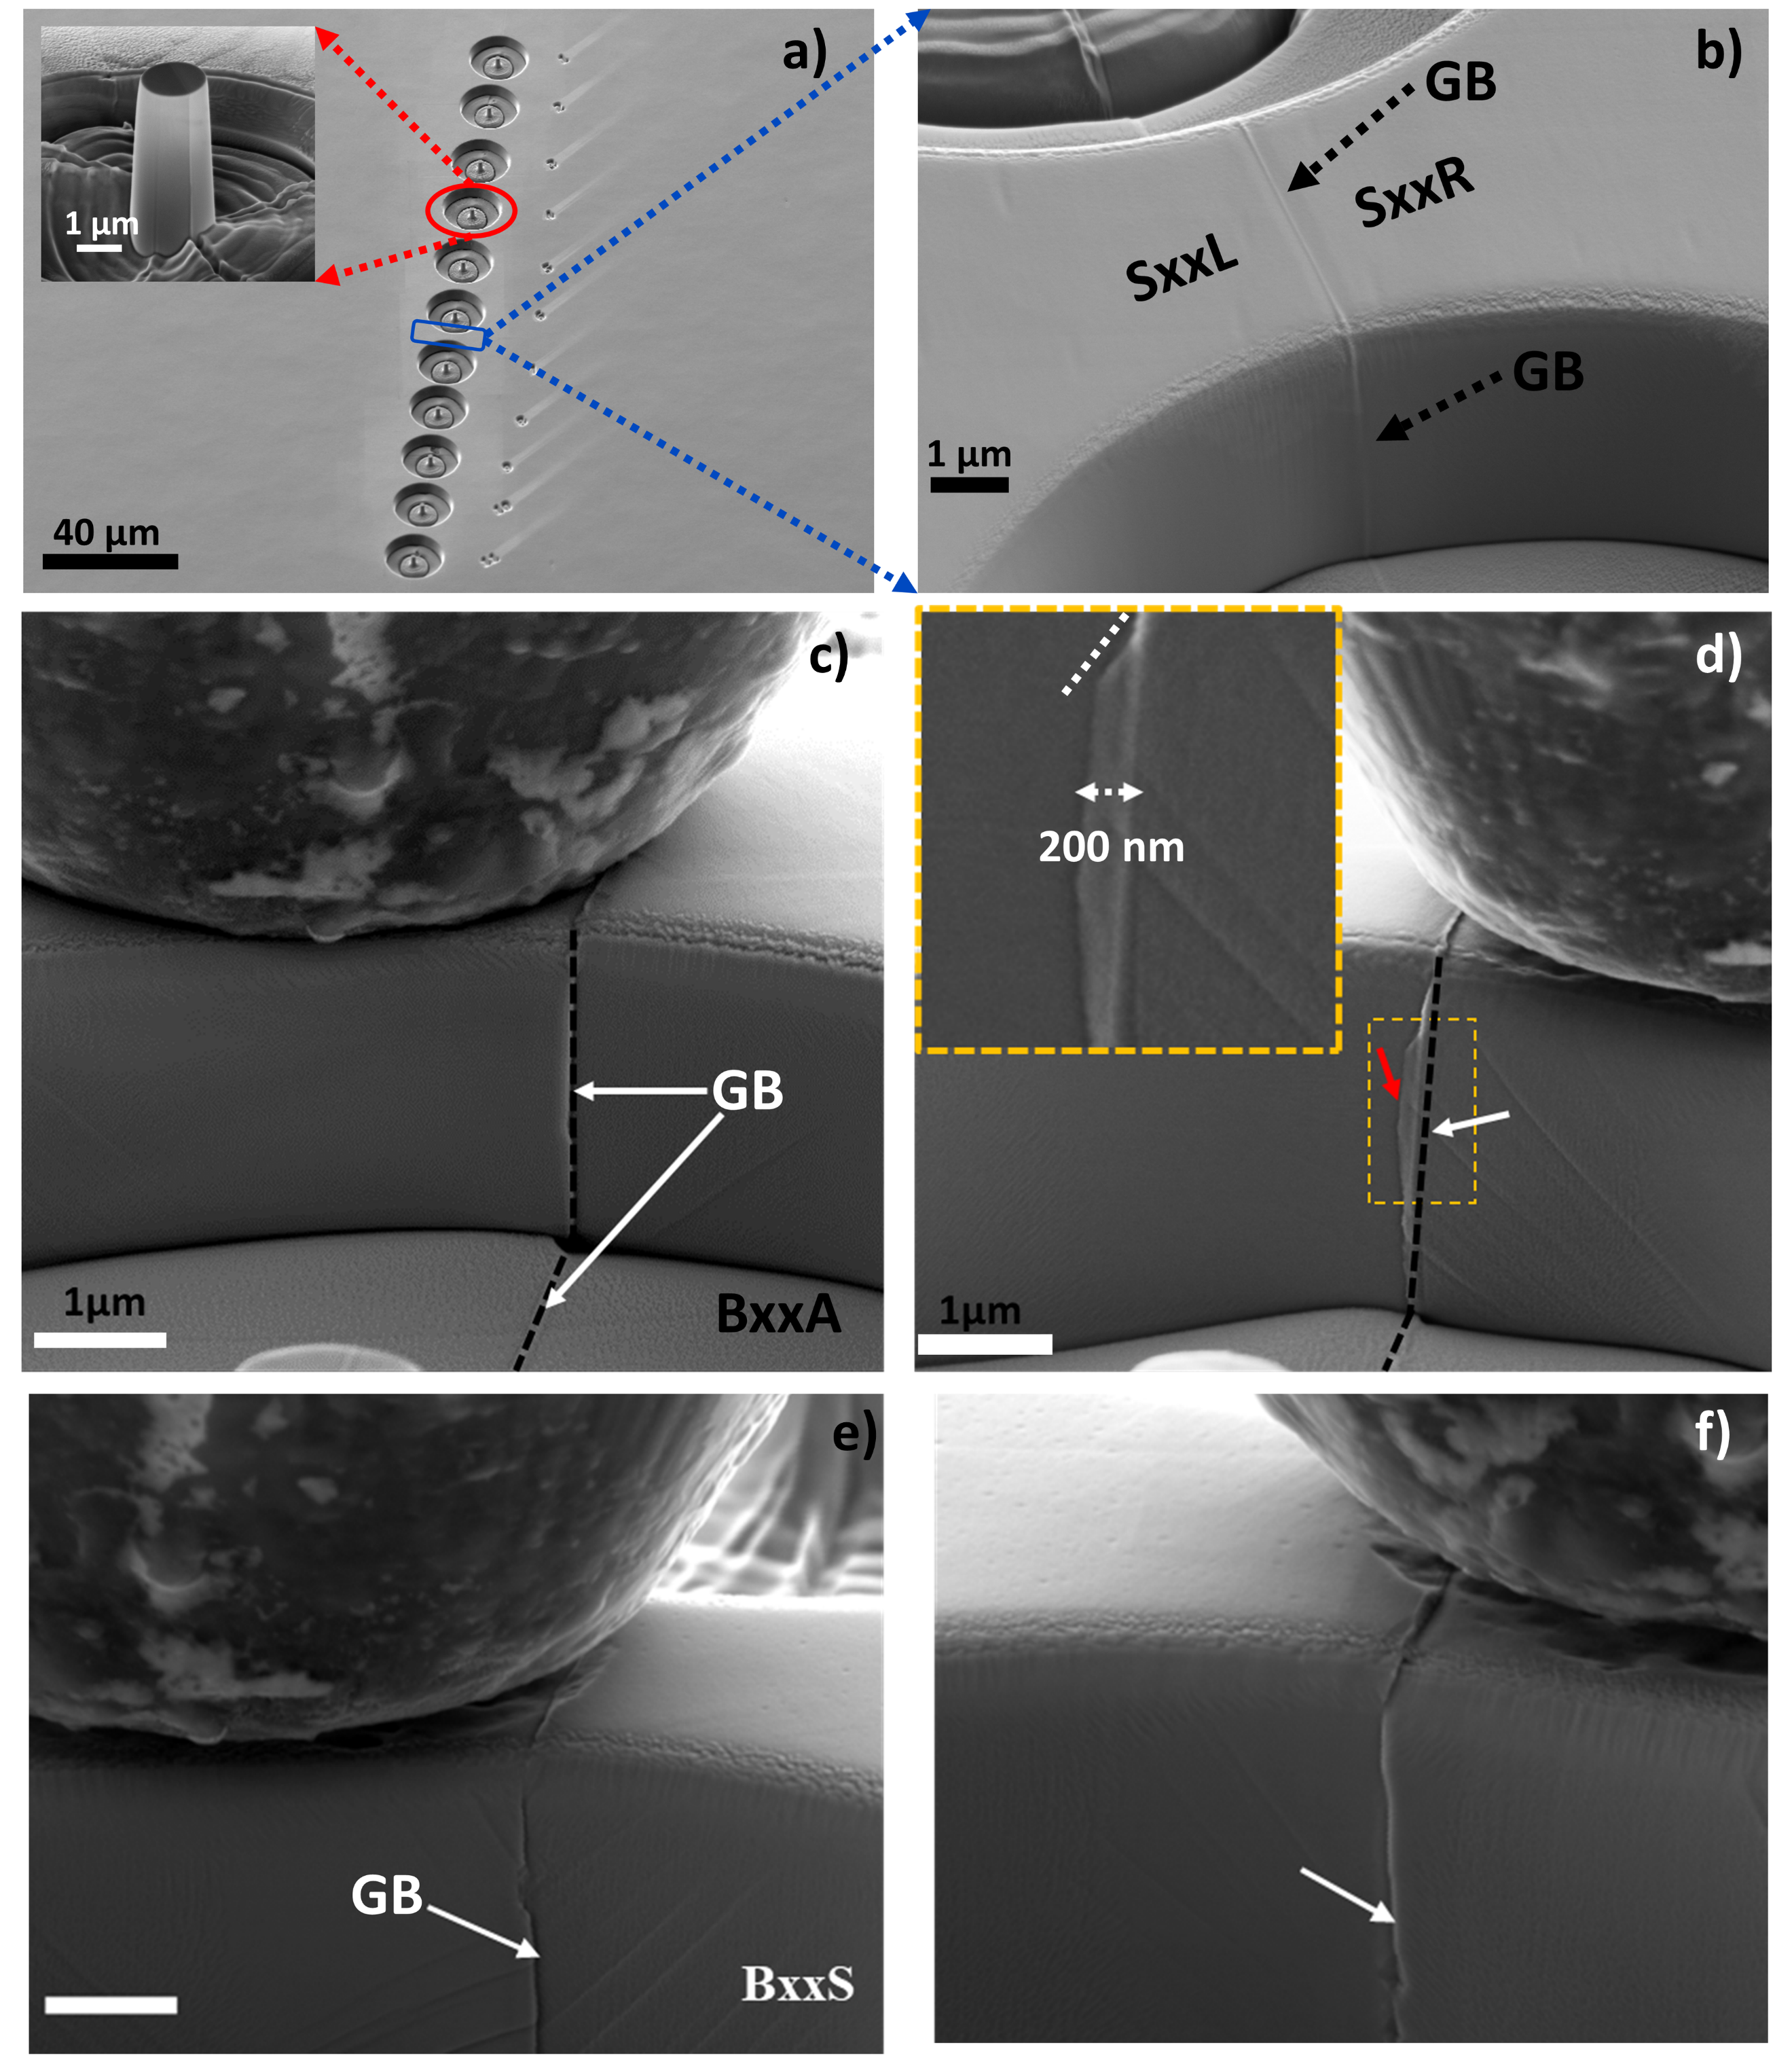


**Figure S3:** (a) An array of micropillars on BxxA, with the inset showing an undeformed micropillar. The magnified region in **(b)** corresponds to the area defined as the “microwall” used for flat-punch indentation. The GB is marked with dashed black arrows **(c-f)** Post-indentation SEM images of the microwall configuration **(c–d**) Indentation on BxxA, with **(c)** corresponding to an indent on SxxL and **(d)** on SxxR. **(e–f)** Indentation on BxxS on either side. Comparisons reveal GB migration/faceting is only observed in **(d).** The white arrow in d highlights the initial GB position, and the red arrow marks the post-indentation position. The white dashed line in the inset image in **(d)** indicates the GB facet corresponding to the {111}/{110} planes.

**
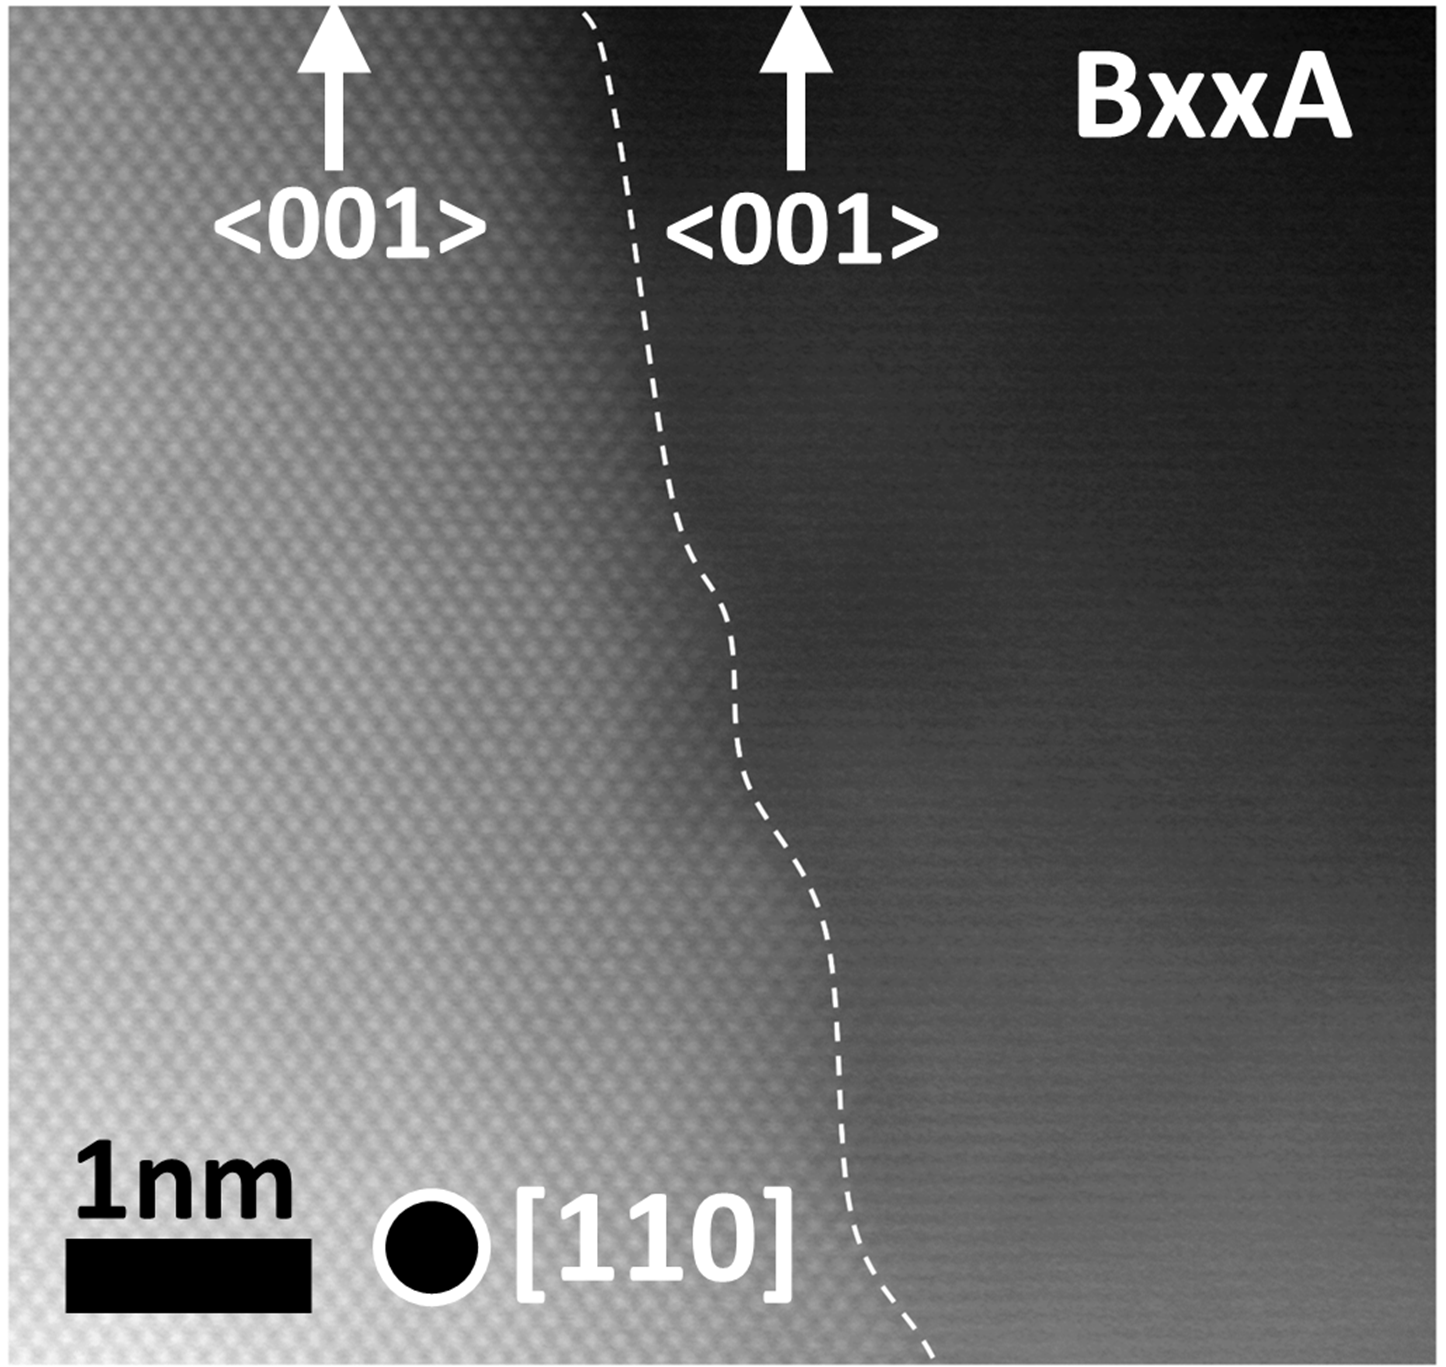
**

**Figure S4:** Cross-sectional TEM micrograph of the BxxA, where SxxR is viewed along the [110] zone axis. The GB, marked by a white dashed line exhibits nanoscale undulations.

**Section S2: Crystal Plasticity Fast Fourier Transform Simulations**


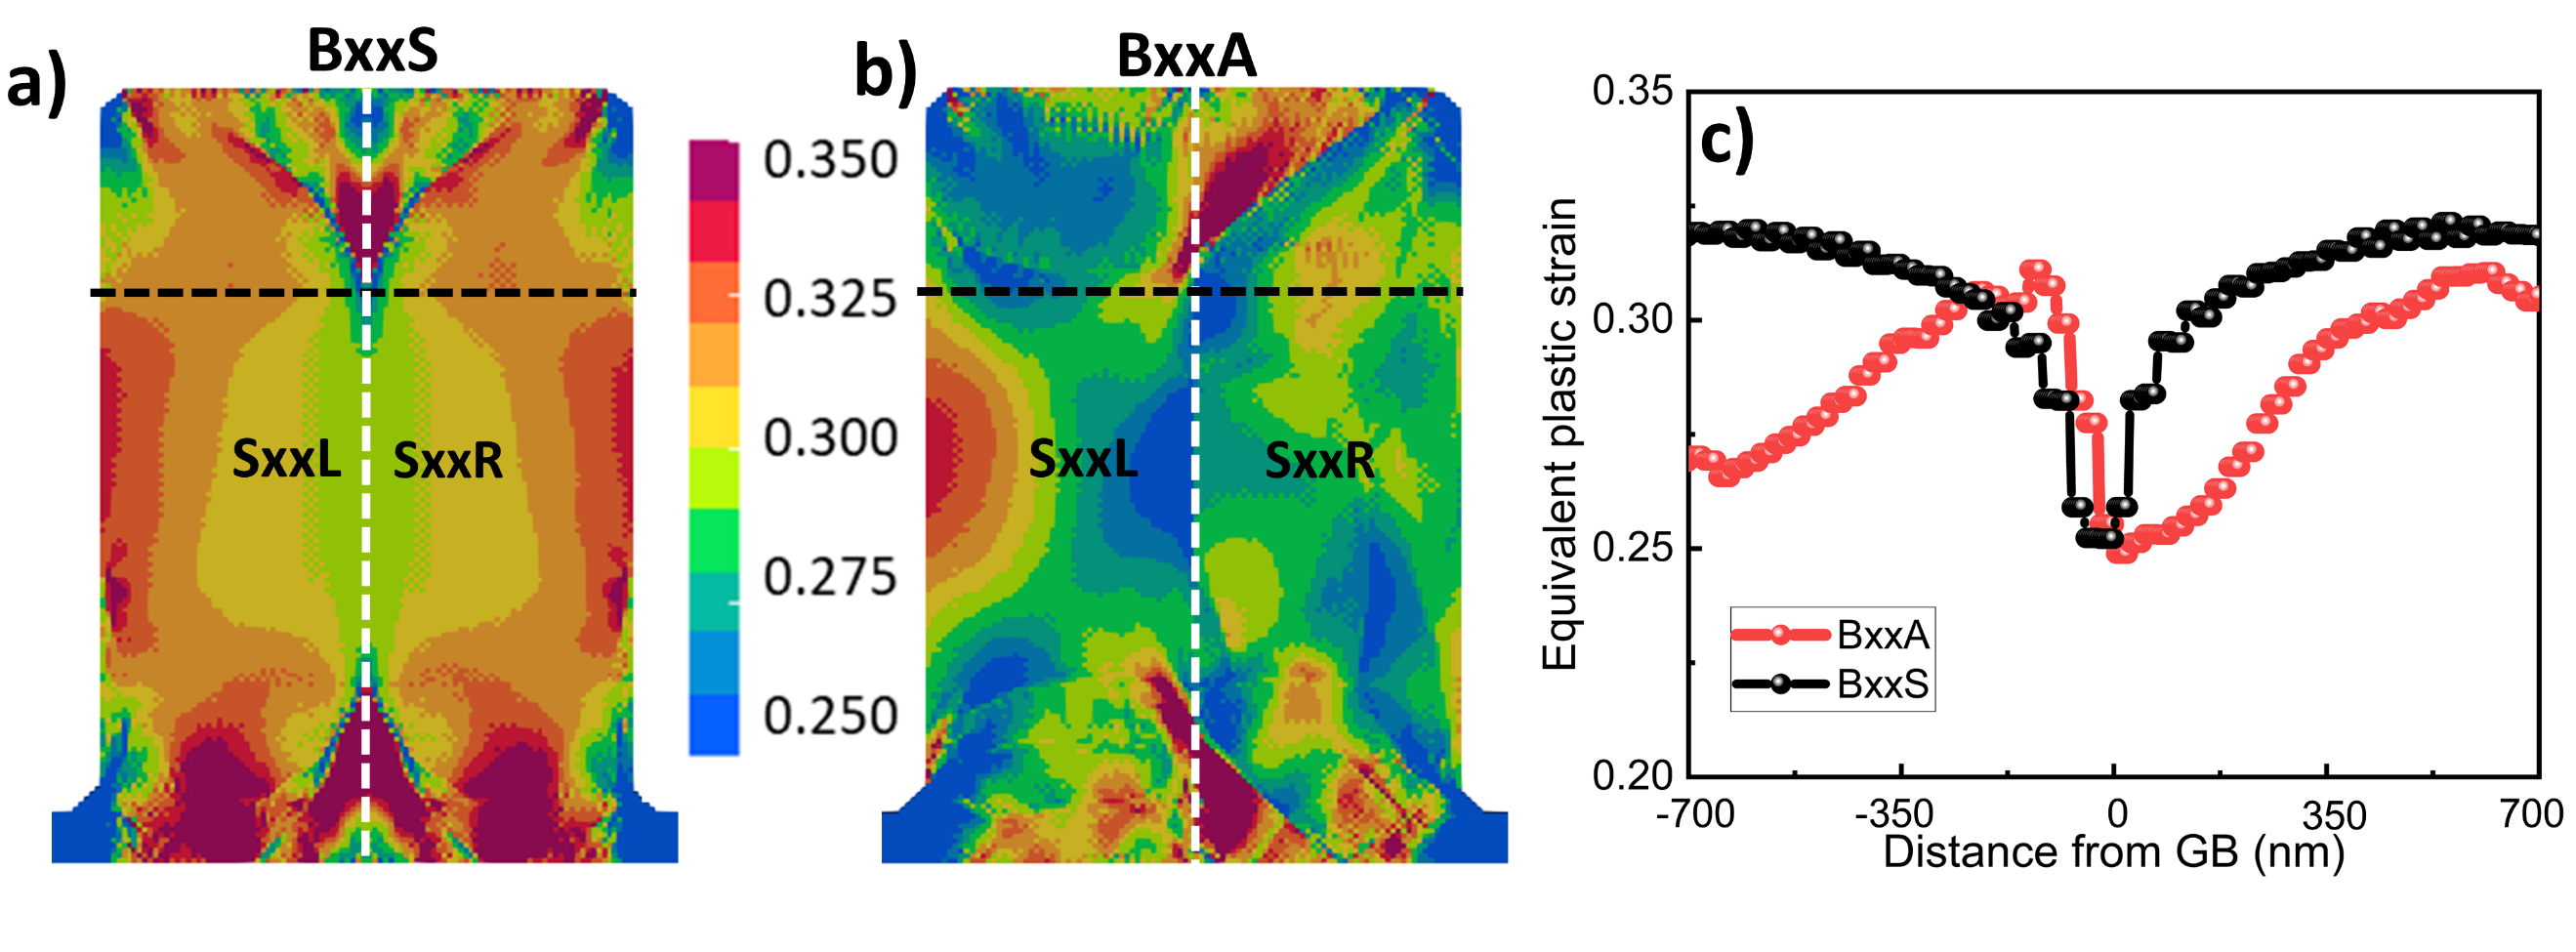


**Figure S5:** a-b) Equivalent plastic strain in BxxS and BxxA GB. The values extracted along the black dashed line are shown in (c).


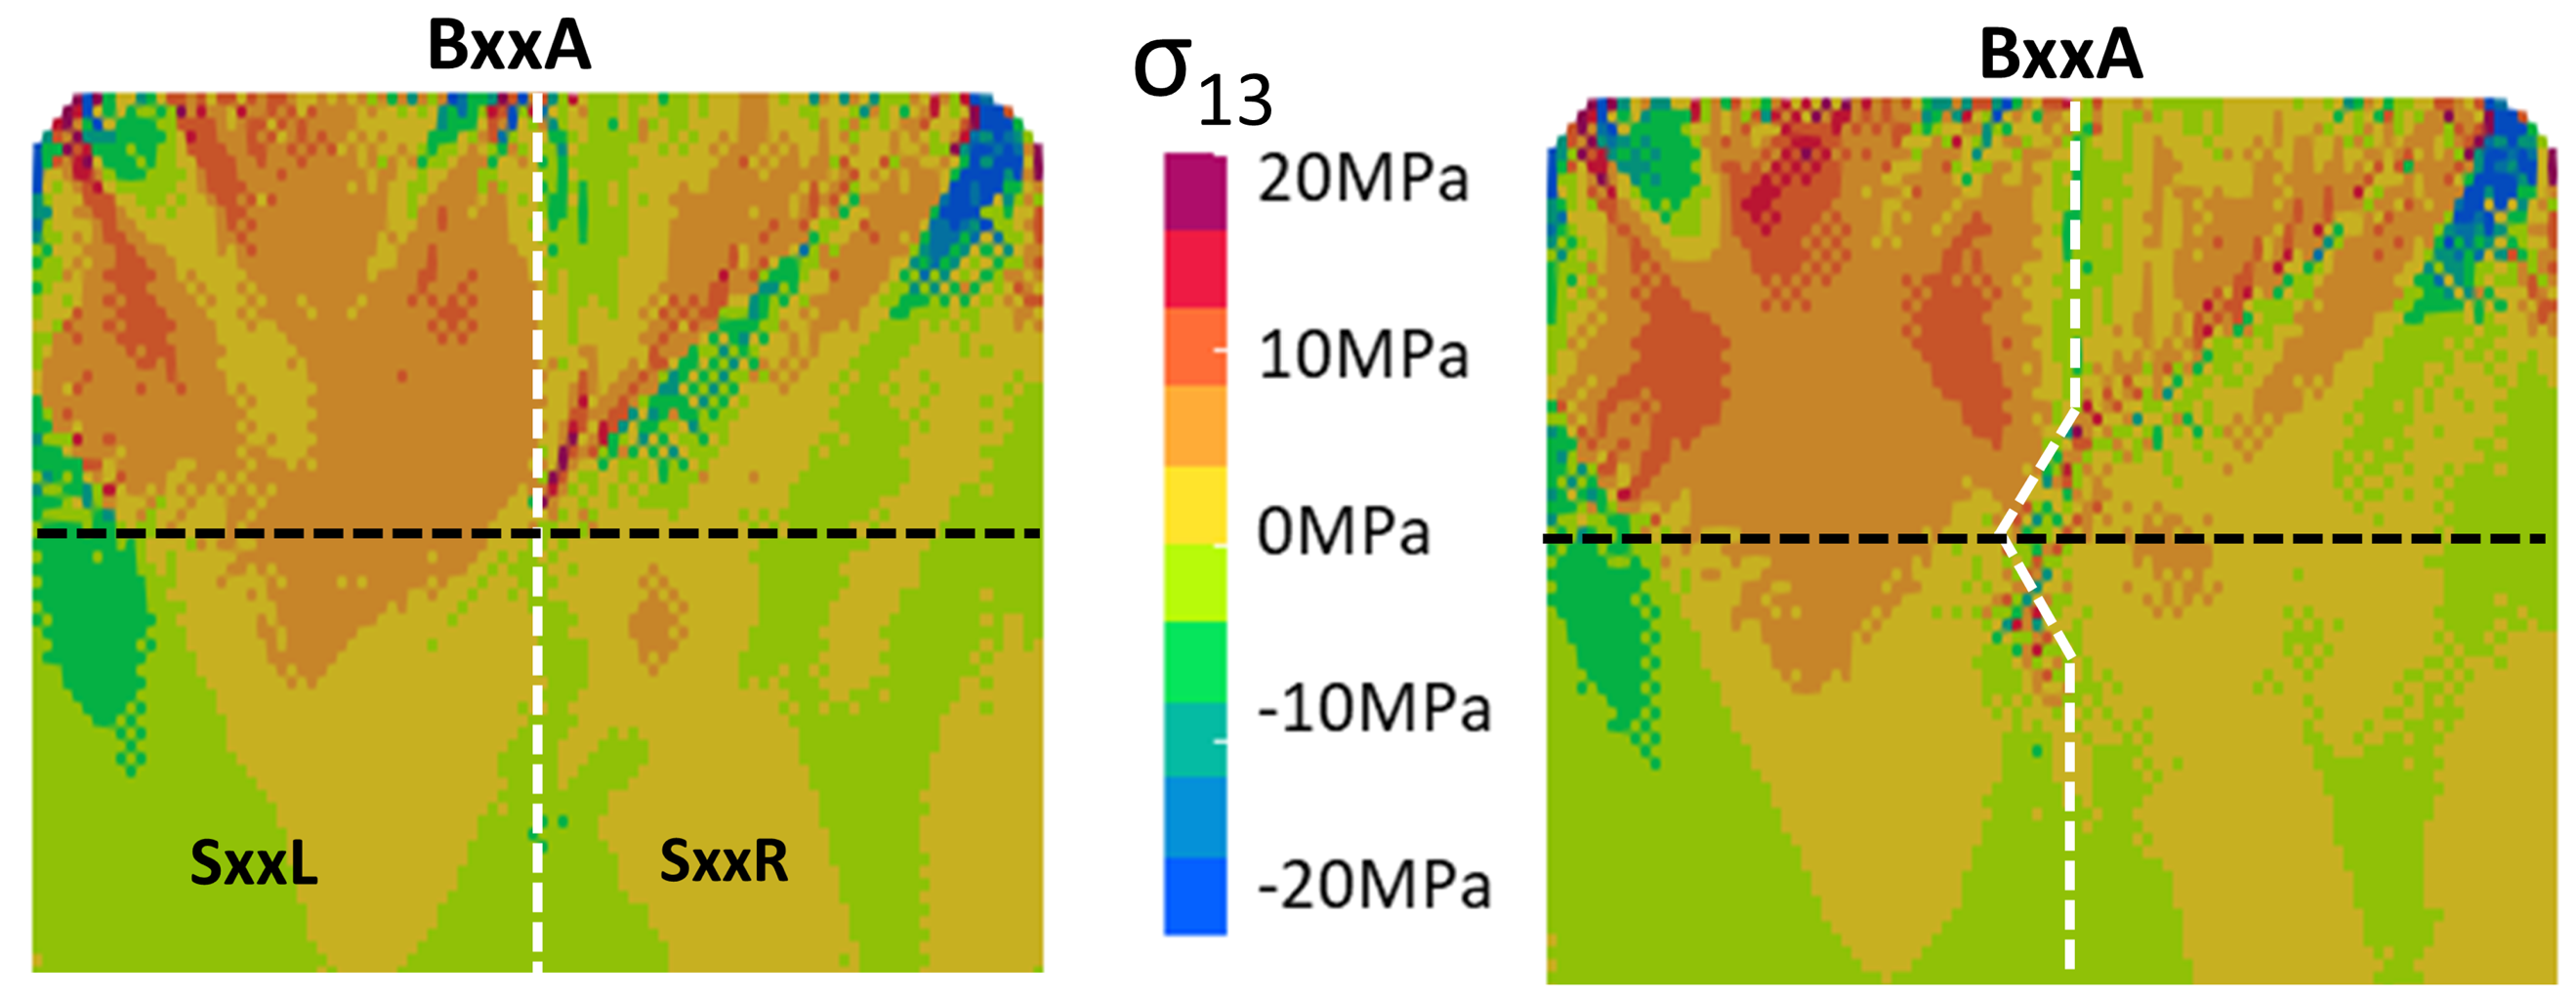


**Figure S6:** Shear stress distribution along the GB plane before (left) and after the onset of GB bulging (right). For a flat GB (left), the resolved shear stress σ13 is negligible (σ13/σvM≈0.005), a slight GB bulge (right) in the strong energy gradient region increases this ratio tenfold (σ13/σvM≈0.05).

**Section S3. Phase-field crystal simulations**

**
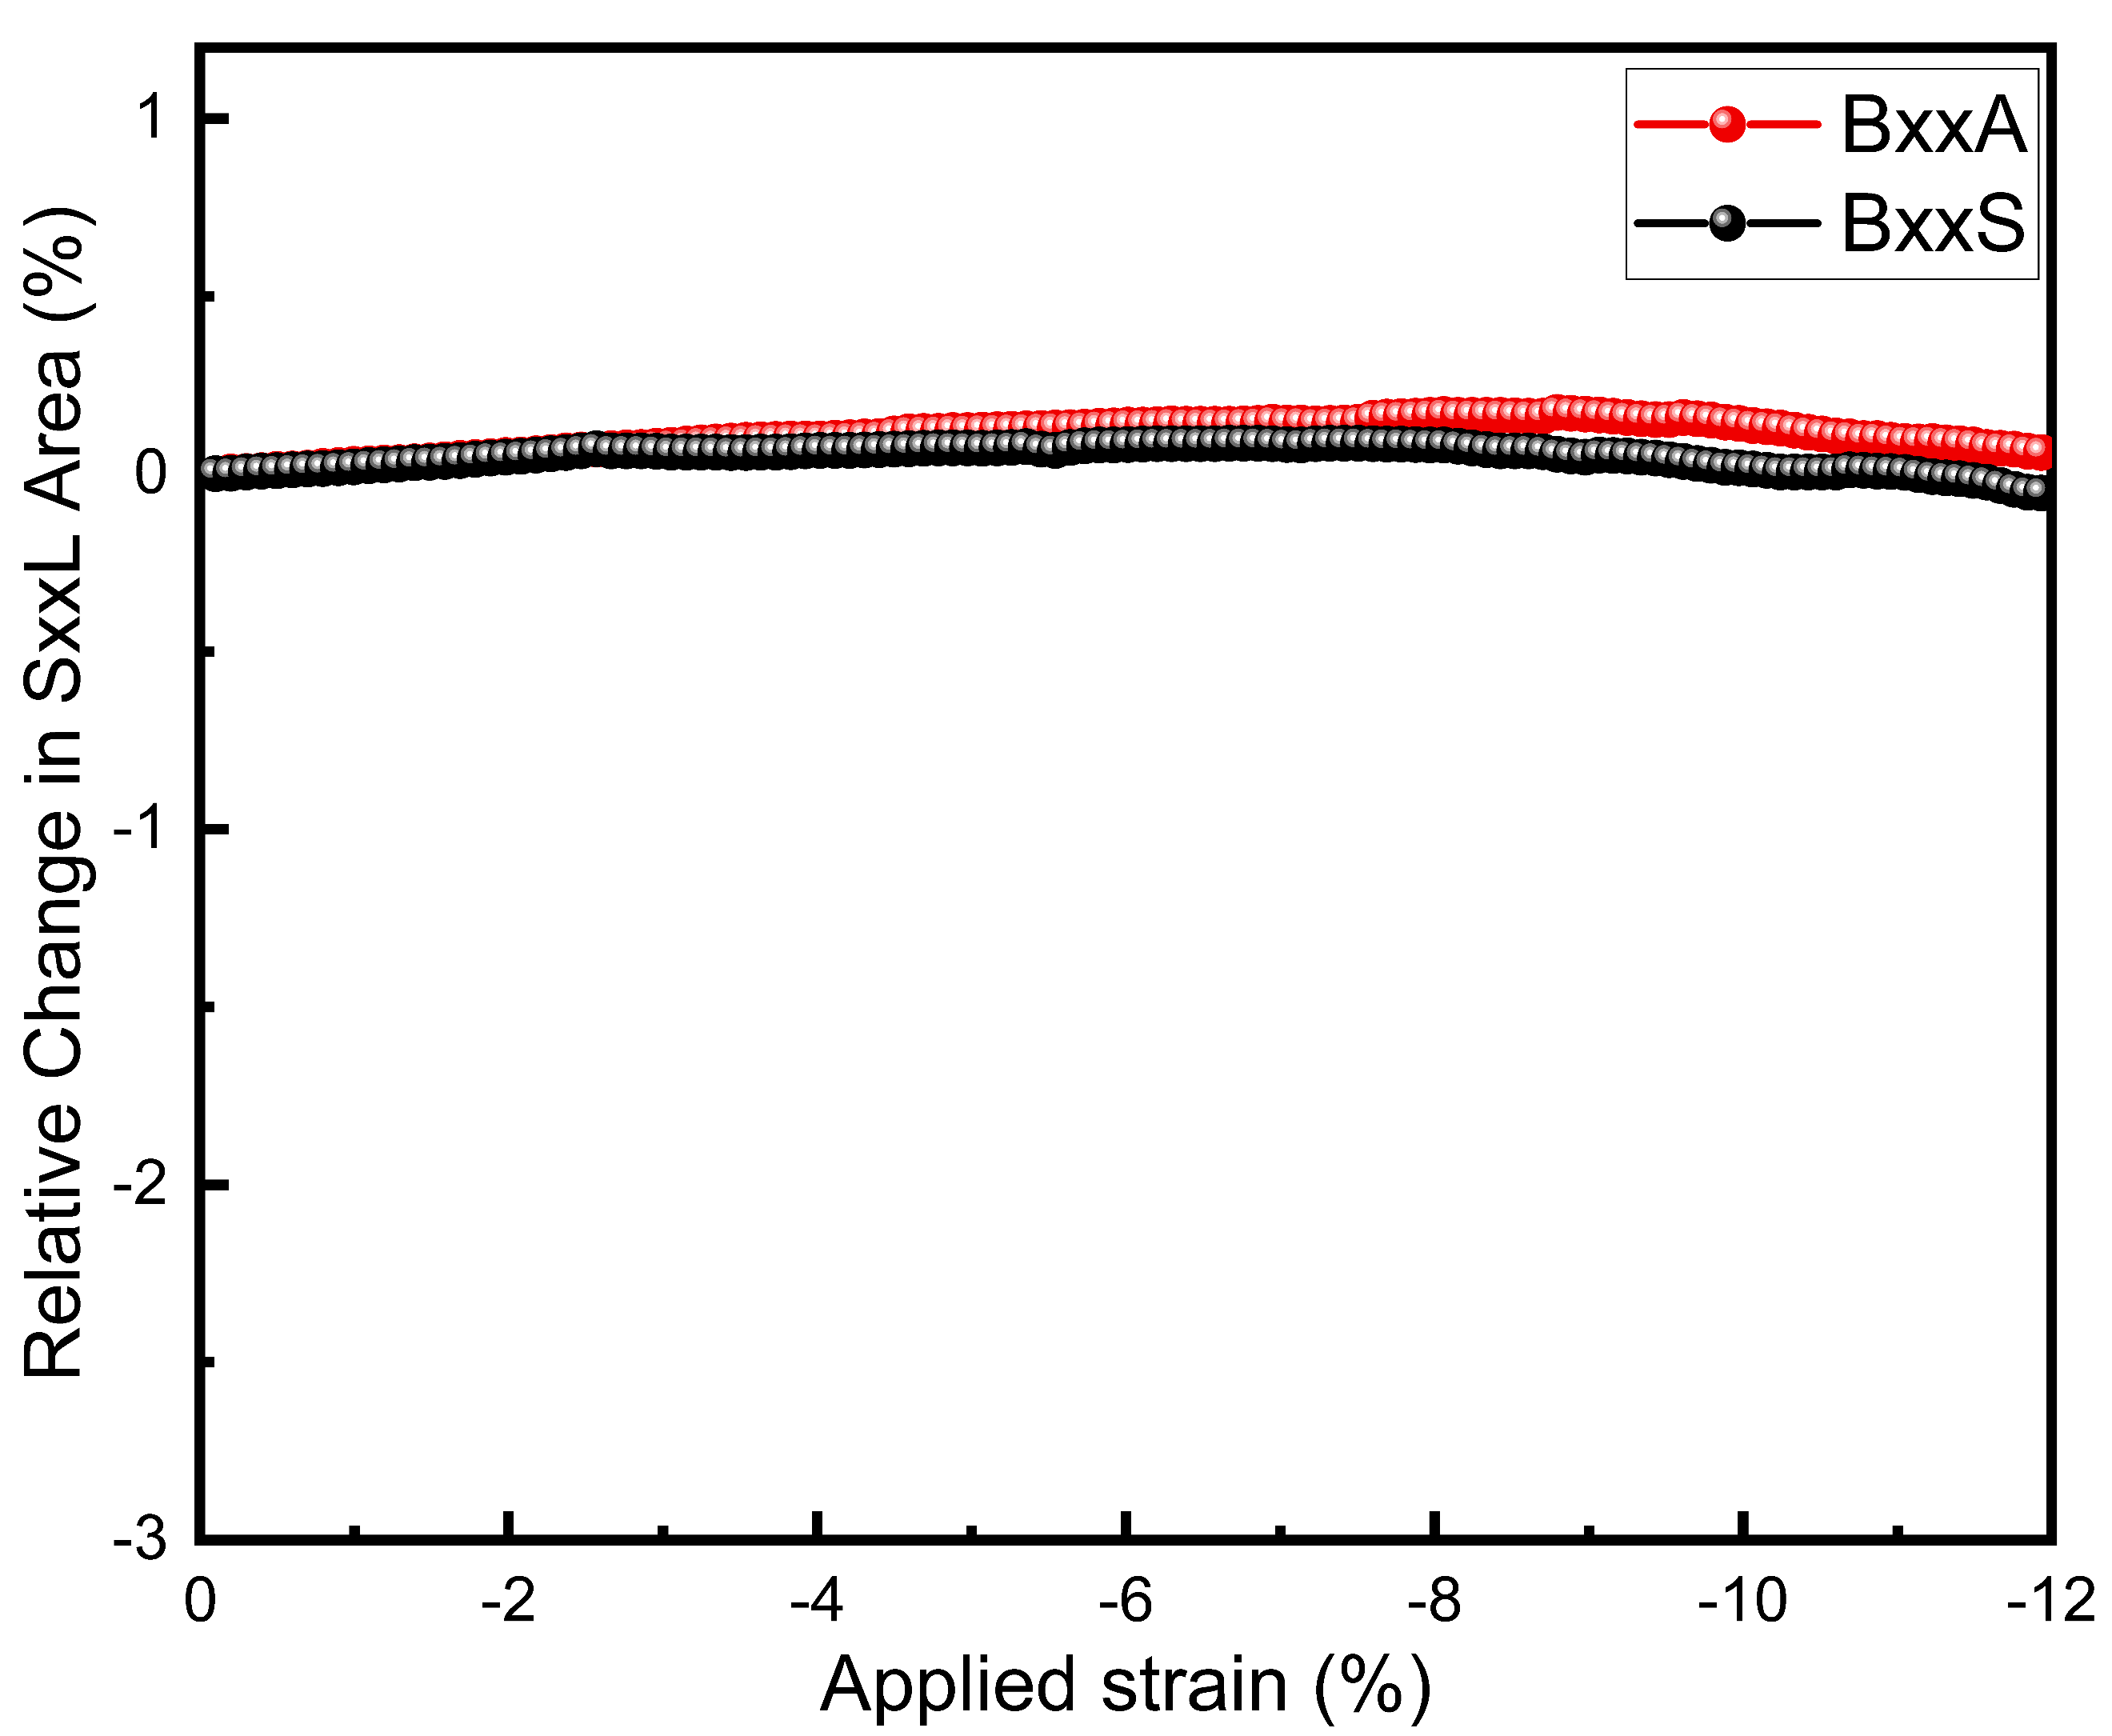
**

**Figure S7:** No migration under uniaxial compression along the tilt axis *z* in either of the GB.

**Section S4: Molecular Dynamics Simulations**


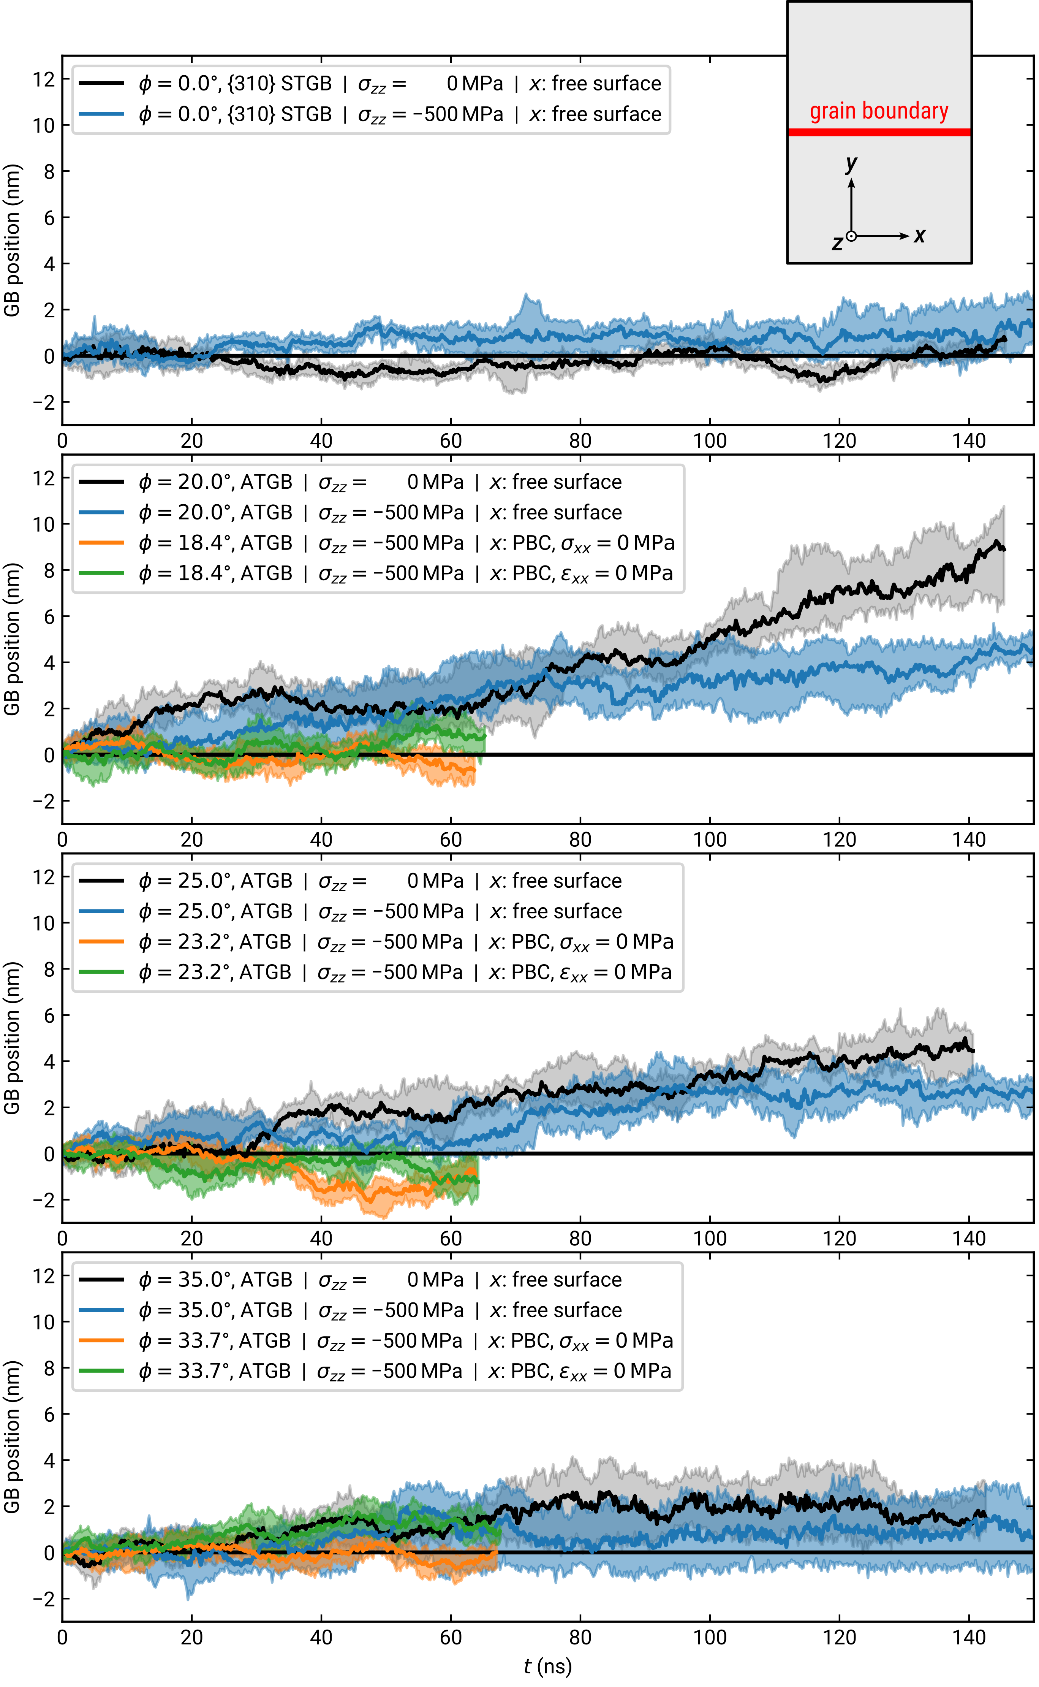


**Figure S8:** Molecular dynamics simulations of various Σ5 GBs with [001] tilt axis. Bicrystals of size 20×160×0.3615 nm³ were constructed with different inclinations ϕ from the symmetric {310} boundary. They contained no defects apart from grain boundary and surfaces. The *z* direction was always periodic and the *y* direction always open. We used a small size along *z* and temperature of 800 K in order to accelerate the grain boundary mobility as much as possible. For the *x* direction, we tested free surfaces, periodic boundaries (PBC) with a barostat at zero stress, or fixed boundaries (*ε* = 0). Low-index grain boundary planes were chosen for the PBC samples such that their periodic *x* length was reasonable. The inclination angles therefore slightly deviate from the open boundary samples. We applied either zero or 500 MPa compressive stress along the tilt axis (*z*). When keeping the *x* direction at fixed strain, we obtained a compressive stress of around 300 MPa along *x*. We can observe some GB movement in the asymmetric GBs, but there is no statistically significant difference between different stress states, including zero stress. The samples with free surfaces in *x* direction might be slightly more mobile. We conclude that dislocation-free samples exhibit no GB mobility—apart from thermal fluctuations—under these stress conditions.

**Section S5: Molecular Statics simulations**


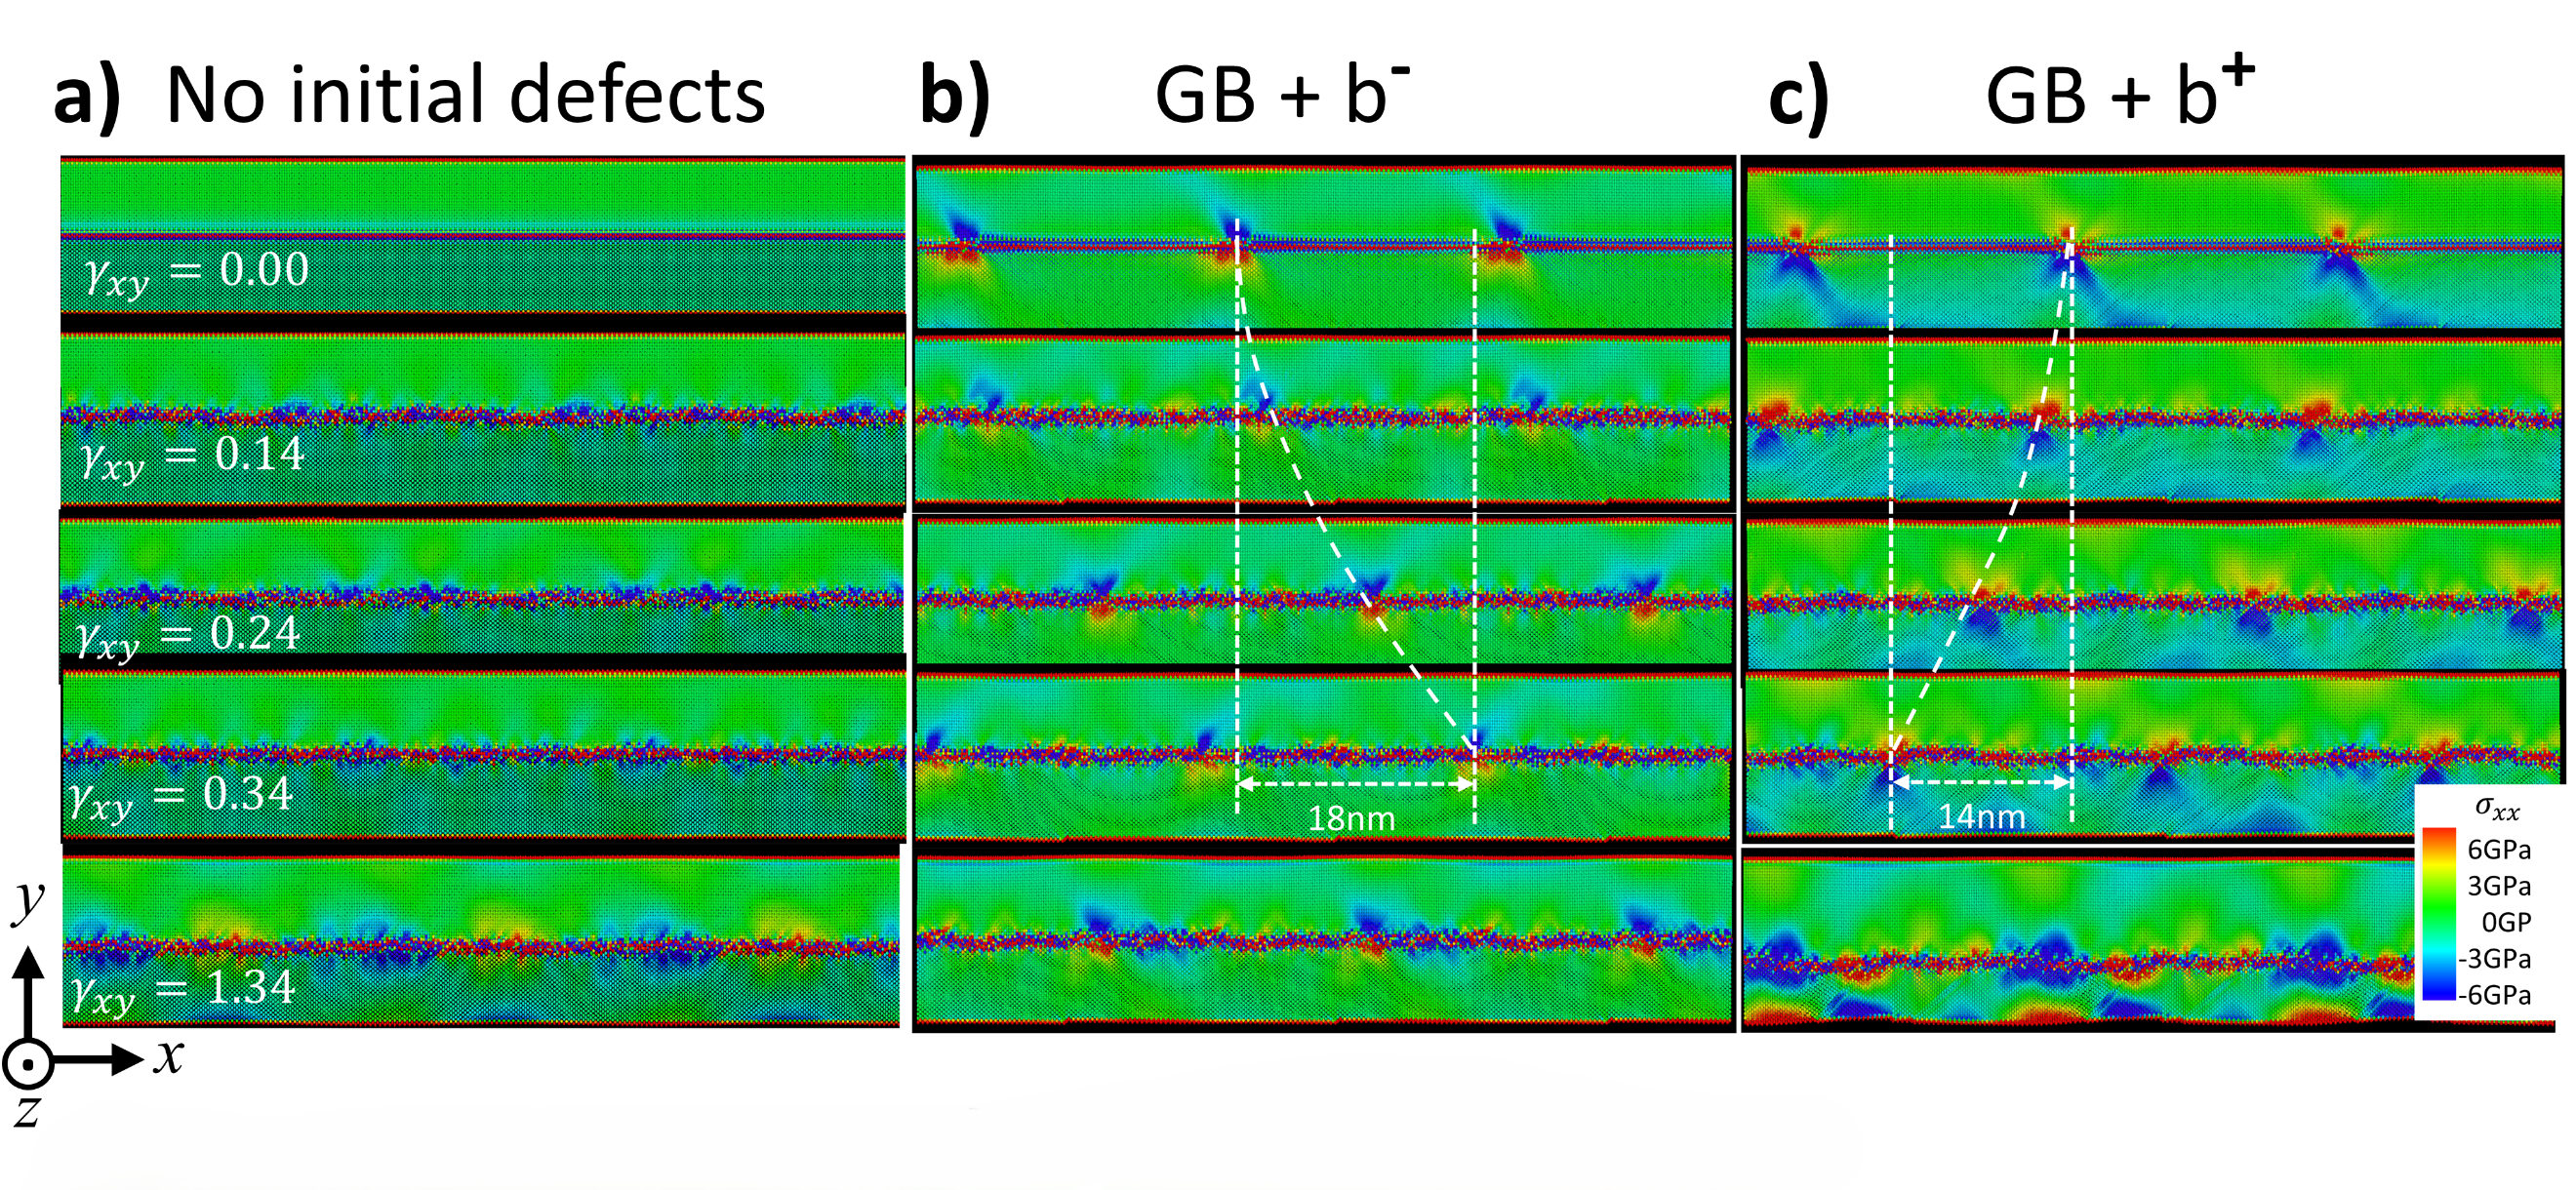


**Figure S9:** Shear coupling for BxxA with and without dislocations. (a) Migration of perfect BxxA. (b) BxxA absorbed a negative Burgers vector b-  and (c) a positive Burgers vector b+

**Table 1**: Shear coupling factor (β) corresponding to fig 6c

| Case | β |
| --- | --- |
| b+, negative shear | -21 |
| b-, positive shear | -26 |
| b-, negative shear | -30 |
| no initial defects, negative shear | -34 |
| no initial defects, positive shear | -43 |
| b+, positive shear | -46 |
